# Supplementary material for: Individuals Who Believe in the Paranormal Expose Themselves to Biased Information and Develop More Causal Illusions than Nonbelievers in the Laboratory
Source: PLoS One. 2015 Jul 15;10(7):e0131378. doi: 10.1371/journal.pone.0131378 (PMC4503786; doi:10.1371/journal.pone.0131378)
Supplement: S1 Dataset — (XLS) [file pone.0131378.s001.xls]

## Sheet: DATA
ID	Jzero	Jpositive	NumRespZero	NumRespPositive	PRZero	PRPositive	Age	Gender	PBSTOTAL	PBSReligion	PBSPSI	PBSWitch	PBSSupers	PBSSpirit	PBSextraTrad	PBSPrecog	PBSET	Desire	AttScience	IE	PBSitem1	PBSitem2	PBSitem3	PBSitem4	PBSitem5	PBSitem6	PBSitem7	PBSitem8	PBSitem9	PBSitem10	PBSitem11	PBSitem12	PBSitem13	PBSitem14	PBSitem15	PBSitem16	PBSitem17	PBSitem18	PBSitem19	PBSitem20	PBSitem21	PBSitem22	PBSitem23	PBSitem24	PBSitem25	PBSitem26	PBSitem27	PBSitem28	PBSitem29
1	10	73	18	20	0.45	0.5	19	2	1.96667	2.5	2.66667	1.44444	1	2	1.5	1.75	2.25	3.44444	1.82	12	3	3	2	1	3	2	1	1	3	1	1	2	1	1	5	4	1	1	2	6	2	1	5	1	1	3	1	1	1
2	70	80	27	32	0.675	0.8	19	1	1.46667	1.5	1	1.11111	1	2	3	1.25	2.75	1.21053	1.74	-11	3	1	1	1	1	1	1	1	1	1	1	1	1	1	1	1	1	1	5	7	1	1	7	1	1	2	2	1	1
3	4	89	7	28	0.175	0.7	18	1	1.36667	1.25	1.16667	1.33333	1	1.5	3	1.5	2.75	2.31579	1.87755	1	2	1	1	1	1	1	1	1	1	1	1	1	1	1	1	1	1	1	2	7	2	1	7	1	1	2	1	1	2
4	70	70	40	39	1	0.975	20	1	3.8	3.5	3	4	3	4.83333	4	4	4.5	4.42105	1.66	23	7	3	5	3	5	3	5	1	3	5	3	5	3	3	5	3	3	3	5	6	3	1	6	5	4	5	3	3	3
5	37	72	8	39	0.2	0.975	19	1	1.03333	1	1	1	1	1	1.33333	1	1.25	2.84211	1.83674	7	1	1	1	1	1	1	1	1	1	1	1	1	1	1	1	1	1	1	1	2	1	1	7	1	1	1	1	1	1
6	10	80	16	29	0.4	0.725	18	1	1.76667	1.5	1.5	2.22222	1	2	2.33333	2.5	2	1.31579	2	-9	2	1	1	1	3	1	1	1	1	3	1	1	1	1	2	1	1	1	4	5	3	1	6	4	1	5	1	1	1
7	0	70	10	34	0.25	0.85	19	1	1.56667	1	2.16667	1	1	1.66667	3	1	2.5	2	2.28	-3	1	2	1	1	5	1	1	1	1	1	1	1	1	1	1	1	1	1	1	7	1	1	1	1	1	1	1	1	1
8	76	65	40	37	1	0.925	18	1	1.23333	2	1	1.11111	1	1.5	1.33333	1.25	1.5	3.6	2	11	4	1	1	1	1	1	1	1	1	1	1	1	1	1	2	1	1	1	1	2	1	1	7	1	1	2	1	1	1
9	65	61	34	29	0.85	0.725	18	1	1.43333	1.75	2	1.44444	1	1	1	1	1	2.10526	2.44	1	1	1	1	1	1	1	1	1	1	1	1	1	1	1	4	1	1	1	1	1	1	1	1	5	1	1	1	1	1
11	25	80	18	24	0.45	0.6	18	1	2.46667	2	2.66667	3.33333	1	4.16667	2.33333	3.25	3.75	2.10526	2.16667	-1	5	1	3	1	5	1	1	1	1	1	1	6	1	1	1	1	1	1	1	5	6	1	7	5	6	5	1	1	2
12	51	86	24	35	0.6	0.875	18	1	1.9	1.75	2.16667	1.88889	1	1.5	4	2.25	2.5	2	1.68	-3	2	2	4	1	1	4	1	1	4	1	1	1	1	1	3	2	1	1	3	7	3	1	7	1	1	4	1	1	1
13	80	70	37	25	0.925	0.625	20	1	2.86667	2.25	2.66667	3.44444	1	4.83333	2.66667	2.25	3.5	1.89474	1.79592	-3	6	1	5	1	6	1	1	1	1	3	1	5	1	1	1	1	2	1	6	6	2	1	2	6	5	5	1	2	1
14	53	67	19	20	0.475	0.5	19	1	2.53333	3.75	3	2.55556	1	3	2.66667	2.5	3.25	2	1.86	-1	5	3	2	1	2	1	1	1	2	2	1	1	1	1	6	3	2	1	5	6	3	3	3	2	2	5	2	2	3
15	50	75	33	40	0.825	1	20	2	1.3	1.75	1.83333	1	1	1.16667	1.33333	1	1.25	3.89474	1.18	17	2	1	1	1	1	1	1	1	1	1	1	1	1	1	3	1	1	1	1	2	1	1	2	1	1	1	1	1	1
16	65	75	37	33	0.925	0.825	25	1	1.92857	2	3.16667	1.875	1	2.83333	1	1.25	1.5	1.84211	1.96	-3	5	3	2	1	2	1	1	1	3	0	0	1	1	1	1	2	2	1	4	1	2	1	1	2	2	1	1	1	3
17	77	85	40	40	1	1	18	1	2.03333	4.75	1.33333	1.44444	1	2.66667	2.33333	2	2	2.57895	1.82	3	5	1	1	1	1	1	1	3	2	1	1	3	1	1	6	1	1	1	5	5	1	5	6	1	1	5	1	1	1
18	80	65	39	32	0.975	0.8	18	1	2.43333	2.75	3.33333	2.11111	1	3	2.66667	2.5	2.5	2.42105	2.36	1	3	3	2	1	3	2	2	1	2	1	1	3	1	1	4	3	1	1	5	5	3	3	2	2	3	4	2	2	1
19	60	83	17	3	0.425	0.075	18	1	1.5	1.5	2	1.22222	1	1.33333	2	1.25	2.25	2.36842	2.14	1	1	1	1	1	1	1	1	1	1	1	1	1	1	1	3	1	1	1	2	4	1	1	2	1	2	2	2	1	1
20	67	85	25	33	0.625	0.825	18	1	1.66667	1.25	1	1.11111	1	1.5	3.33333	1.25	4.5	2.36842	2.06	1	2	1	1	1	2	2	1	1	1	1	1	1	2	1	1	1	1	1	2	6	1	1	7	1	1	2	6	1	1
21	2	5	37	30	0.925	0.75	18	1	1.7	3	2	1	1.66667	2	2	1	1.75	2.15789	2.8	-1	5	1	1	2	3	1	1	1	1	1	2	1	1	1	5	1	1	1	1	4	1	1	1	1	1	1	1	1	1
22	10	65	19	29	0.475	0.725	18	1	1.43333	1.5	2	1.11111	1	1.16667	2.33333	1.25	2	2.25	2.53061	1	2	1	1	1	1	1	1	1	1	1	1	1	1	1	2	1	1	1	1	5	1	1	1	1	1	2	1	1	1
23	60	75	17	27	0.425	0.675	19	1	2.36667	2	1.83333	2.55556	2.33333	2	3.66667	2.5	4.5	0.947368	2.02	-13	2	1	3	2	2	2	1	2	2	1	2	1	3	2	2	1	1	3	1	6	2	2	6	2	3	5	4	3	3
24	51	67	28	32	0.7	0.8	19	1	2.46667	2	2.16667	2.66667	2	1.83333	3.66667	2.5	3.75	1.10526	2.1	-11	2	1	2	1	1	3	2	3	2	3	3	2	3	2	1	2	2	2	2	5	3	2	5	5	2	3	5	2	2
25	50	70	22	35	0.55	0.875	18	2	1.96667	4.25	1.66667	1.22222	2.33333	2.5	1.66667	1.5	1.5	3.36842	2	11	5	1	1	2	3	1	1	1	1	1	2	2	1	1	6	2	1	3	3	3	2	5	5	1	1	2	1	1	1
26	80	80	40	38	1	0.95	19	1	2.96667	3.5	2	2.77778	4	3.33333	4	2.25	3.5	2.26316	1.92	1	5	2	2	5	2	4	2	2	2	3	5	2	2	3	5	2	2	2	5	6	2	2	6	6	2	2	2	2	4
27	0	60	38	40	0.95	1	19	1	2.4	2	2.5	2	2	2.66667	2.66667	2.25	3.5	0.842105	2.1	-15	2	1	1	2	3	1	2	2	2	2	2	5	2	2	2	2	2	2	2	5	2	2	2	2	2	3	2	2	2
28	15	25	40	39	1	0.975	19	1	2.63333	3.25	2.5	2.22222	1.33333	4.66667	3.33333	2.25	3	1.21053	2.48	-9	7	1	2	2	6	3	1	2	1	1	1	6	1	1	2	1	1	1	5	6	4	2	2	3	2	3	2	2	2
29	70	80	26	37	0.65	0.925	18	1	1.6	1.25	2.5	1.66667	1	1.66667	2	1.75	1.5	2.94737	2.34	7	2	2	2	1	2	1	1	1	1	2	1	1	2	2	1	1	1	1	1	3	2	1	2	1	3	2	1	1	1
33	70	90	29	39	0.725	0.975	18	1	2.13333	4.75	1	1.22222	3	2.83333	2.33333	1.25	2.25	2.05263	1.46	-1	6	1	1	5	3	1	1	1	1	1	3	1	1	1	6	1	1	1	5	5	1	6	7	1	1	2	2	2	1
34	70	45	36	30	0.9	0.75	18	1	1.83333	3	2.33333	1.11111	1	1.83333	2.33333	1.25	2.25	3.10526	2.38	9	2	1	1	1	1	1	1	1	2	1	1	1	1	1	7	1	1	1	5	5	2	2	1	1	1	1	1	1	1
35	68	78	32	39	0.8	0.975	26	1	3.2	4.5	2.83333	3.66667	1	3.66667	4.33333	4.25	2	1.78947	2.42	-5	5	2	4	1	4	4	5	4	4	4	1	4	4	2	5	2	2	1	4	5	5	4	4	4	4	5	1	4	1
40	70	50	39	35	0.975	0.875	18	1	2.73333	1.75	2.83333	2.22222	2.33333	2.5	3.66667	2.75	4.5	1.73684	2.04	-5	4	4	2	1	4	4	4	1	2	2	4	1	1	3	1	1	2	2	2	6	2	1	2	4	2	2	5	2	2
41	90	60	39	36	0.975	0.9	18	1	4.13333	2.75	3.66667	5	1.33333	5.33333	4.33333	5.25	6	2.26316	2.06	1	7	3	5	1	7	5	5	2	2	5	2	5	2	7	1	2	4	1	2	6	4	1	2	5	5	5	6	6	6
42	45	65	40	38	1	0.95	18	1	1.76667	2.5	1.83333	1.77778	1.66667	2.16667	1.33333	2.75	1	1.68421	2.54	-5	5	2	2	2	2	2	2	1	1	1	1	1	1	2	3	1	1	2	2	1	2	1	5	1	2	5	1	1	1
44	92	68	40	38	1	0.95	18	1	1.96667	3.75	1.33333	1.77778	1	2.66667	2.66667	2.25	2.75	1.89474	1.94	-3	5	1	1	1	2	1	1	5	1	1	1	1	1	1	3	1	1	1	4	6	1	2	5	1	1	6	1	1	3
45	65	80	40	38	1	0.95	18	1	1.4	1.5	1.66667	1	1	1.33333	2.33333	1	2	3	1.78	9	2	1	1	1	1	2	1	1	1	1	1	1	1	1	2	1	1	1	2	4	1	1	3	1	1	1	1	1	1
48	85	75	37	32	0.925	0.8	18	2	3.1	2	2.66667	4	1	4.83333	3.33333	3.25	5.75	2.94737	2.02041	7	5	2	2	1	5	1	1	1	2	5	1	5	3	1	1	2	2	1	5	6	5	1	5	5	2	6	5	2	7
49	85	95	22	25	0.55	0.625	19	2	1.34483	1	2.66667	1.44444	1	1	1	2	1	4.26316	1.38	21	1	1	1	1	1	1	1	1	1	1	1	1	1	1	1	1	1	1	1	0	5	1	1	1	1	1	1	1	1
50	67	84	36	35	0.9	0.875	18	1	2.7	3.75	3.83333	2.55556	1	3.33333	3	3.75	4	2.89474	2	7	6	4	1	1	1	1	2	1	2	1	1	2	1	1	6	2	1	1	5	7	6	2	1	1	2	6	2	1	4
53	17	70	1	36	0.025	0.9	18	1	1.23333	2.25	0.833333	1	1	1.16667	2	1	1.75	3.68421	2.26531	15	2	1	1	1	1	1	1	1	1	1	1	1	1	1	5	1	1	1	1	4	1	1	4	1	1	1	1	1	1
54	78	75	40	40	1	1	18	1	3.23333	4	3.66667	4.33333	1	3.5	3	3.25	2.5	1.63158	1.68	-5	7	1	5	1	5	1	1	1	5	5	1	2	1	1	7	4	5	1	4	7	5	1	3	5	2	6	1	5	1
55	85	80	37	35	0.925	0.875	22	2	1.6	2.75	1	1	1	1.16667	2.66667	1	3.75	4.21053	1.8	21	2	1	1	1	1	1	1	1	1	1	1	1	1	1	7	1	1	1	1	6	1	1	7	1	1	1	4	1	1
56	70	66	26	23	0.65	0.575	18	2	2.63333	3	3.33333	3.22222	2	3.33333	2	2.75	3	2.26316	2.1	1	3	2	2	2	2	1	1	2	2	2	2	3	1	2	4	2	2	2	3	4	4	3	3	4	5	4	1	2	4
57	25	70	23	30	0.575	0.75	20	1	2.13333	3.5	3	1.44444	1	3	2.66667	1.75	2.25	2.52632	1.74	3	6	2	1	1	2	1	1	1	2	1	1	1	1	1	6	2	1	1	6	6	3	1	1	1	2	2	1	1	1
58	18	77	14	36	0.35	0.9	18	1	1.5	2	2	1	1	1.16667	2.33333	1	2.25	3.26316	1.6	11	2	1	1	1	1	1	1	1	1	1	1	1	1	1	4	1	1	1	1	5	1	1	1	1	1	1	1	1	1
59	42	77	23	33	0.575	0.825	18	2	2.63333	3	3.16667	2.44444	2	2.5	3	2	2.75	1.26316	2.30612	-9	4	5	6	2	3	2	2	2	2	2	2	2	2	2	4	2	2	2	2	5	2	2	2	2	2	2	2	2	2
61	50	48	39	37	0.975	0.925	18	1	3	6.25	2.83333	3.11111	1	4.5	3	2.25	3.75	2.66667	2.28	4	6	2	3	1	4	2	1	7	3	2	1	4	2	1	7	2	2	1	2	5	3	5	6	2	5	4	2	1	6
62	66	82	33	39	0.825	0.975	18	1	1.5	3	1	1	1	2.33333	2	1	1.75	1.52632	2.08	-7	5	1	1	1	2	1	1	1	1	1	1	1	1	1	5	1	1	1	4	4	1	1	7	1	1	1	1	1	1
63	80	50	40	36	1	0.9	19	1	1.66667	2.25	1.16667	1.33333	2	1.83333	3	1.5	2.5	1.73684	2.0625	-5	4	1	2	3	3	1	2	1	1	1	2	1	1	1	2	1	1	1	1	7	2	2	7	1	1	1	1	2	1
64	50	67	32	38	0.8	0.95	18	1	2.66667	2.5	2.83333	2.22222	1.66667	2.66667	3.33333	3	2.75	0.947368	2.2	-13	4	2	3	2	3	2	3	2	3	3	1	4	3	5	2	2	2	2	2	5	2	2	2	2	2	2	3	3	1
65	51	60	28	28	0.7	0.7	19	2	1.8	5.5	2	1	1	2	1	1	1	2.78947	1.72	5	7	1	1	1	1	1	1	4	1	1	1	1	1	1	7	1	1	1	1	1	1	4	1	1	1	1	1	1	1
66	68	85	32	35	0.8	0.875	19	2	3.3	3.75	4	4.55556	2.33333	3.16667	3	3	4.5	3.05263	2.56	9	5	3	6	2	1	1	1	3	3	3	4	1	3	1	6	1	5	1	1	5	4	1	1	4	6	6	4	2	5
67	75	81	37	37	0.925	0.925	18	1	1.6	3.25	2	1	1	2	1.66667	1	1.5	1.78947	2.30612	-5	6	1	1	1	1	1	1	1	1	1	1	1	1	1	5	1	1	1	2	3	1	1	1	1	1	1	1	1	1
68	39	70	23	27	0.575	0.675	19	1	2.9	2.75	3.66667	3.22222	1	4	3	3.25	4	1.94737	2.18	-3	6	2	2	1	3	1	2	1	3	3	1	3	1	1	3	3	3	1	6	7	5	1	2	4	3	5	3	1	3
69	57	65	29	33	0.725	0.825	18	2	3.6	5	2.83333	4.33333	3.66667	3.33333	3.66667	3	4.5	1.94737	1.64	-3	5	2	5	3	2	3	2	5	2	3	5	2	2	2	5	2	5	3	3	6	5	5	5	5	3	3	2	5	5
70	50	60	22	32	0.55	0.8	19	2	3.03333	5.5	3	1.66667	2.33333	3.5	3.33333	2	4.25	2.10526	2.4	-1	7	3	1	3	3	3	1	5	3	1	1	3	2	3	7	3	1	3	3	5	1	3	3	2	3	3	5	1	2
71	75	88	25	34	0.625	0.85	18	1	1.93333	3.25	1	1.33333	1	2.83333	3	1	2.5	1.73684	1.76	-5	5	1	1	1	4	4	1	1	1	1	1	1	1	1	6	1	1	1	5	4	1	1	7	4	1	1	1	1	1
72	50	56	29	21	0.725	0.525	18	1	1.63333	1	2.5	1.44444	1	1	3	2	2	1.73684	2.14	-5	1	1	1	1	1	3	1	1	4	1	1	1	1	1	1	1	1	1	1	5	1	1	1	1	1	5	1	1	1
73	65	76	40	39	1	0.975	18	1	3.23333	3.75	5	2.88889	1	4	3	3.5	4	1.44444	2.3	-8	5	5	4	1	6	1	2	4	6	1	1	2	2	1	2	5	2	1	5	6	6	4	2	1	2	5	4	1	4
74	55	85	25	33	0.625	0.825	18	1	3.33333	4.25	2.16667	3.77778	1.33333	5.16667	3.66667	2.5	5.75	1.63158	2.5	-5	5	1	3	1	5	4	2	4	1	1	2	6	1	2	4	1	4	1	4	6	4	4	7	5	5	2	5	4	6
75	9	43	3	38	0.075	0.95	19	1	1.73333	2.5	2.16667	1.22222	1.33333	2.16667	2.66667	1.5	2.25	1.41176	2.64	-7	5	1	1	2	3	1	1	1	1	1	1	2	1	1	3	1	1	1	1	6	3	1	2	1	1	1	1	1	1
76	82	75	40	37	1	0.925	18	1	2.66667	2.25	3.16667	3.44444	1	4.66667	1.66667	4	2.5	3.10526	1.44	9	6	1	3	1	6	1	3	1	1	3	1	4	1	3	1	1	1	1	3	3	4	1	1	4	5	6	2	1	4
77	50	75	19	33	0.475	0.825	18	1	1.63333	2.5	1.33333	1.66667	1	1.66667	1.33333	3.5	1.25	1.27273	2.42	-7	4	1	1	1	2	1	1	1	1	1	1	1	1	5	2	1	1	1	1	2	2	3	6	1	1	6	1	1	1
78	81	73	40	26	1	0.65	18	1	2.8	5.25	2.83333	2.55556	2	3	3	2.5	2.5	2.36842	2.2	4	5	4	3	2	4	1	2	5	1	1	2	2	4	2	6	3	3	2	1	4	3	5	5	3	3	3	1	1	3
[truncated: 100 more columns]

## Sheet: ColumnNames
	Column Name	Explanation
	ID	Participant's number
	Jzero	Judgment in the noncontingent problem
	Jpositive	Judgment in the contingent problem
	NumRespZero	Number of trials in which the medicine was used (noncontingent problem)
	NumRespPositive	Number of trials in which the medicine was used (contingent problem)
	PRZero	P(Medicine) in the noncontingent problem
	PRPositive	P(Medicine) in the contingent problem
	Age	Age (years)
	Gender	Gender (1 = Female; 2 = Male)
	PBSTOTAL	Total score in the R-PBS
	PBSReligion	R-PBS Religion subscale
	PBSPSI	R-PBS Psi subscale
	PBSWitch	R-PBS Witchcraft subscale
	PBSSupers	R-PBS Superstition subscale
	PBSSpirit	R-PBS Spiritualism subscale
	PBSextraTrad	R-PBS Monsters (Extraordinary Life Forms) subscale
	PBSPrecog	R-PBS Precognition subscale
	PBSET	R-PBS Extraterrestial life subscale
	Desire	Desire for Control score
	AttScience	Attitude towards Science score
	IE	Locus of Control score
	PBSitem1	R-PBS item 1
	PBSitem2	R-PBS item 2
	PBSitem3	R-PBS item 3
	PBSitem4	R-PBS item 4
	PBSitem5	R-PBS item 5
	PBSitem6	R-PBS item 6
	PBSitem7	R-PBS item 7
	PBSitem8	R-PBS item 8
	PBSitem9	R-PBS item 9
	PBSitem10	R-PBS item 10
	PBSitem11	R-PBS item 11
	PBSitem12	R-PBS item 12
	PBSitem13	R-PBS item 13
	PBSitem14	R-PBS item 14
	PBSitem15	R-PBS item 15
	PBSitem16	R-PBS item 16
	PBSitem17	R-PBS item 17
	PBSitem18	R-PBS item 18
	PBSitem19	R-PBS item 19
	PBSitem20	R-PBS item 20
	PBSitem21	R-PBS item 21
	PBSitem22	R-PBS item 22
	PBSitem23	R-PBS item 23
	PBSitem24	R-PBS item 24
	PBSitem25	R-PBS item 25
	PBSitem26	R-PBS item 26
	PBSitem27	R-PBS item 27
	PBSitem28	R-PBS item 28
	PBSitem29	R-PBS item 29
	PBSitem30	R-PBS item 30
	IELoCitem1	Locus of control item 1
	IELoCitem2	Locus of control item 2
	IELoCitem3	Locus of control item 3
	IELoCitem4	Locus of control item 4
	IELoCitem5	Locus of control item 5
	IELoCitem6	Locus of control item 6
	IELoCitem7	Locus of control item 7
	IELoCitem8	Locus of control item 8
	IELoCitem9	Locus of control item 9
	IELoCitem10	Locus of control item 10
	IELoCitem11	Locus of control item 11
	IELoCitem12	Locus of control item 12
	IELoCitem13	Locus of control item 13
	IELoCitem14	Locus of control item 14
	IELoCitem15	Locus of control item 15
	IELoCitem16	Locus of control item 16
	IELoCitem17	Locus of control item 17
	IELoCitem18	Locus of control item 18
	IELoCitem19	Locus of control item 19
	IELoCitem20	Locus of control item 20
	IELoCitem21	Locus of control item 21
	IELoCitem22	Locus of control item 22
	IELoCitem23	Locus of control item 23
	Desireitem1	Desire of control item 1
	Desireitem2	Desire of control item 2
	Desireitem3	Desire of control item 3
	Desireitem4	Desire of control item 4
	Desireitem5	Desire of control item 5
	Desireitem6	Desire of control item 6
	Desireitem7	Desire of control item 7
	Desireitem8	Desire of control item 8
	Desireitem9	Desire of control item 9
	Desireitem10	Desire of control item 10
	Desireitem11	Desire of control item 11
	Desireitem12	Desire of control item 12
	Desireitem13	Desire of control item 13
	Desireitem14	Desire of control item 14
	Desireitem15	Desire of control item 15
	Desireitem16	Desire of control item 16
	Desireitem17	Desire of control item 17
	Desireitem18	Desire of control item 18
	Desireitem19	Desire of control item 19
	Desireitem20	Desire of control item 20
	ScAttitem1	Attitude towards Science item 1
	ScAttitem2	Attitude towards Science item 2
	ScAttitem3	Attitude towards Science item 3
	ScAttitem4	Attitude towards Science item 4
	ScAttitem5	Attitude towards Science item 5
	ScAttitem6	Attitude towards Science item 6
	ScAttitem7	Attitude towards Science item 7
	ScAttitem8	Attitude towards Science item 8
	ScAttitem9	Attitude towards Science item 9
	ScAttitem10	Attitude towards Science item 10
	ScAttitem11	Attitude towards Science item 11
	ScAttitem12	Attitude towards Science item 12
	ScAttitem13	Attitude towards Science item 13
	ScAttitem14	Attitude towards Science item 14
	ScAttitem15	Attitude towards Science item 15
	ScAttitem16	Attitude towards Science item 16
	ScAttitem17	Attitude towards Science item 17
	ScAttitem18	Attitude towards Science item 18
	ScAttitem19	Attitude towards Science item 19
	ScAttitem20	Attitude towards Science item 20
	ScAttitem21	Attitude towards Science item 21
	ScAttitem22	Attitude towards Science item 22
	ScAttitem23	Attitude towards Science item 23
	ScAttitem24	Attitude towards Science item 24
	ScAttitem25	Attitude towards Science item 25
	ScAttitem26	Attitude towards Science item 26
	ScAttitem27	Attitude towards Science item 27
	ScAttitem28	Attitude towards Science item 28
	ScAttitem29	Attitude towards Science item 29
	ScAttitem30	Attitude towards Science item 30
	ScAttitem31	Attitude towards Science item 31
	ScAttitem32	Attitude towards Science item 32
	ScAttitem33	Attitude towards Science item 33
	ScAttitem34	Attitude towards Science item 34
	ScAttitem35	Attitude towards Science item 35
	ScAttitem36	Attitude towards Science item 36
	ScAttitem37	Attitude towards Science item 37
	ScAttitem38	Attitude towards Science item 38
	ScAttitem39	Attitude towards Science item 39
	ScAttitem40	Attitude towards Science item 40
	ScAttitem41	Attitude towards Science item 41
	ScAttitem42	Attitude towards Science item 42
	ScAttitem43	Attitude towards Science item 43
	ScAttitem44	Attitude towards Science item 44
	ScAttitem45	Attitude towards Science item 45
	ScAttitem46	Attitude towards Science item 46
	ScAttitem47	Attitude towards Science item 47
	ScAttitem48	Attitude towards Science item 48
	ScAttitem49	Attitude towards Science item 49
	ScAttitem50	Attitude towards Science item 50
	EmptyPBS	Number of empty answers in the R-PBS questionnaire
	EmptyLoC	Number of empty answers in the Locus of Control questionnaire
	EmptyDesire	Number of empty answers in the Desire for Control questionnaire
	EmptyAttitudeScience	Number of empty answers in the Attitude towards Science questionnaire
